# Supplementary material for: The first report on predictive comparative ligand-based multi-QSAR modeling analysis of 4-pyrimidinone and 2-pyridinone based APJ inhibitors
Source: Royal Society of Chemistry journal article supplement (doi:10.1039/d2nj01923j), 2022-01-01
Supplement: d2nj01923j1.pdf [file d2nj01923j1.pdf]

## Supplementary material

### **First Report on Predictive Comparative Ligand-based Multi-QSAR Modeling Analysis of 4-pyrimidinone and 2-pyridinone based APJ inhibitors**

Suvankar Banerjee,<sup>a</sup> Sandip Kumar Baidya,<sup>a</sup> Balaram Ghosh,<sup>b</sup> Nilanjan Adhikari,<sup>a,\*</sup> Tarun Jha<sup>a,\*</sup>

<sup>a</sup>*Natural Science Laboratory, Division of Medicinal and Pharmaceutical Chemistry, Department of Pharmaceutical Technology, Jadavpur University, Kolkata 700032, India*

<sup>b</sup>*Epigenetic Research Laboratory, Department of Pharmacy, Birla Institute of Technology and Science-Pilani, Hyderabad Campus, Shamirpet, Hyderabad, 500078, India*

Corresponding Authors:

Nilanjan Adhikari (nilanjan\_juphar@rediffmail.com)

Tarun Jha (tjupharm@yahoo.com)

Supplementary Table S1. Structures of APJ inhibitors with their activity

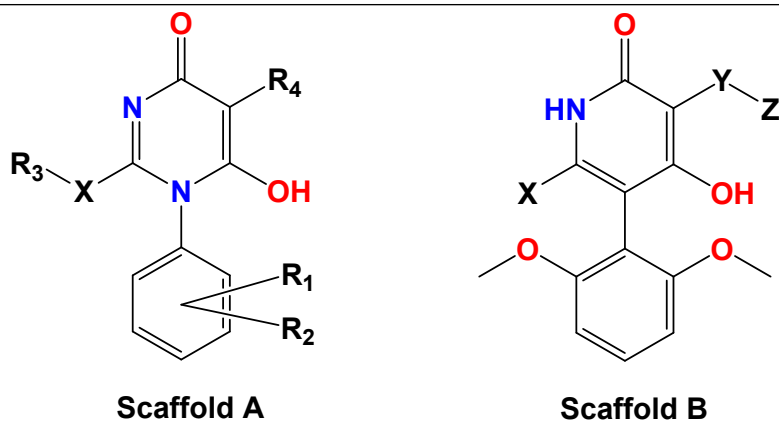

| <i>Scaffold A</i> |                                  |                      |                    |                      |                      |                                 |                         |
|-------------------|----------------------------------|----------------------|--------------------|----------------------|----------------------|---------------------------------|-------------------------|
| <i>Cpd No.</i>    | <i>R<sub>1</sub></i>             | <i>R<sub>2</sub></i> | <i>X</i>           | <i>R<sub>3</sub></i> | <i>R<sub>4</sub></i> | <i>APJ EC<sub>50</sub> (nM)</i> | <i>pEC<sub>50</sub></i> |
| 1                 | H                                | NA                   | s                  | <i>n</i> -Propyl     | H                    | 5000                            | 5.301                   |
| 2                 | 2-OCH <sub>3</sub>               | NA                   | s                  | <i>n</i> -Propyl     | H                    | 64                              | 7.194                   |
| 3 <sup>#</sup>    | 3-OCH <sub>3</sub>               | NA                   | s                  | <i>n</i> -Propyl     | H                    | 940                             | 6.027                   |
| 4                 | 4-OCH <sub>3</sub>               | NA                   | s                  | <i>n</i> -Propyl     | H                    | 6800                            | 5.167                   |
| 5                 | 2-CH <sub>3</sub>                | NA                   | s                  | <i>n</i> -Propyl     | H                    | 100                             | 7.000                   |
| 6 <sup>*</sup>    | 3-CH <sub>3</sub>                | NA                   | s                  | <i>n</i> -Propyl     | H                    | 2900                            | 5.538                   |
| 7                 | 4-CH <sub>3</sub>                | NA                   | s                  | <i>n</i> -Propyl     | H                    | 2600                            | 5.585                   |
| 8                 | 2-Cl                             | NA                   | s                  | <i>n</i> -Propyl     | H                    | 250                             | 6.602                   |
| 9                 | 2-F                              | NA                   | s                  | <i>n</i> -Propyl     | H                    | 160                             | 6.796                   |
| 10 <sup>*</sup>   | 2-Br                             | NA                   | s                  | <i>n</i> -Propyl     | H                    | 155                             | 6.810                   |
| 11                | 2-CF <sub>3</sub>                | NA                   | s                  | <i>n</i> -Propyl     | H                    | 90                              | 7.046                   |
| 12                | 2-C <sub>2</sub> H <sub>5</sub>  | NA                   | s                  | <i>n</i> -Propyl     | H                    | 140                             | 6.854                   |
| 13 <sup>#</sup>   | 2-OC <sub>2</sub> H <sub>5</sub> | NA                   | s                  | <i>n</i> -Propyl     | H                    | 100                             | 7.000                   |
| 14                | 2-OCH <sub>3</sub>               | NA                   | s                  | <i>iso</i> -Propyl   | H                    | 23                              | 7.638                   |
| 15 <sup>*</sup>   | 2-OCH <sub>3</sub>               | NA                   | s                  | <i>iso</i> -Butyl    | H                    | 78                              | 7.108                   |
| 16                | 2-OCH <sub>3</sub>               | NA                   | s                  | Butyl                | H                    | 200                             | 6.699                   |
| 17                | 2-OCH <sub>3</sub>               | NA                   | s                  | <i>n</i> -Propyl     | Methyl               | 1400                            | 5.854                   |
| 18 <sup>*#</sup>  | 2-OCH <sub>3</sub>               | NA                   | s                  | <i>n</i> -Propyl     | Ethyl                | 860                             | 6.066                   |
| 19 <sup>#</sup>   | 2-OCH <sub>3</sub>               | NA                   | s                  | <i>n</i> -Propyl     | Butyl                | 1700                            | 5.770                   |
| 20                | 2-OCH <sub>3</sub>               | NA                   | s                  | <i>n</i> -Propyl     | Benzyl               | 340                             | 6.469                   |
| 21                | 2-OCH <sub>3</sub>               | NA                   | s                  | <i>n</i> -Propyl     | Allyl                | 570                             | 6.244                   |
| 22                | 2-OCH <sub>3</sub>               | NA                   | s                  | <i>n</i> -Propyl     | <i>iso</i> -Propyl   | 450                             | 6.347                   |
| 23                | 2-OCH <sub>3</sub>               | H                    | -CH <sub>2</sub> - | <i>n</i> -Propyl     | H                    | 22                              | 7.658                   |
| 24 <sup>*</sup>   | 2-OCH <sub>3</sub>               | Methyl               | -CH <sub>2</sub> - | <i>n</i> -Propyl     | H                    | 5                               | 8.301                   |
| 25 <sup>#</sup>   | 2-OCH <sub>3</sub>               | Methoxy              | -CH <sub>2</sub> - | <i>n</i> -Propyl     | H                    | 11                              | 7.959                   |
| 26                | 2-OCH <sub>3</sub>               | Methoxy              | -CH <sub>2</sub> - | <i>n</i> -Propyl     | 4-Methoxy Benzyl     | 13                              | 7.886                   |

| <i>Scaffold B</i> |                  |                                          |                          |                                 |                         |
|-------------------|------------------|------------------------------------------|--------------------------|---------------------------------|-------------------------|
| <i>Cpd No.</i>    | <i>X</i>         | <i>Y</i>                                 | <i>Z</i>                 | <i>APJ EC<sub>50</sub> (nM)</i> | <i>pEC<sub>50</sub></i> |
| 27                | <i>n</i> -Butyl  | Ethoxy carbonyl                          | --                       | 450                             | 6.347                   |
| 28 <sup>#</sup>   | <i>n</i> -Butyl  | 5-benzyl-1 <i>H</i> -1,2,4-triazole-3-yl | --                       | 330                             | 6.481                   |
| 29                | <i>n</i> -Butyl  | 3-benzyl-1,2,4-oxadiazole-5-yl           | --                       | 43                              | 7.367                   |
| 30 <sup>*</sup>   | <i>n</i> -Butyl  | 5-benzyl-1,3,4-oxadiazole-2-yl           | --                       | 13                              | 7.886                   |
| 31 <sup>#</sup>   | <i>n</i> -Butyl  | 5-benzyl-1,3,4-oxadiazole-2-yl           | 2-Chloro Benzyl          | 8.6                             | 8.066                   |
| 32                | <i>n</i> -Butyl  | 5-benzyl-1,3,4-oxadiazole-2-yl           | 3-Chloro Benzyl          | 2.6                             | 8.585                   |
| 33                | <i>n</i> -Butyl  | 5-benzyl-1,3,4-oxadiazole-2-yl           | 4-Chloro Benzyl          | 0.4                             | 9.398                   |
| 34                | <i>n</i> -Butyl  | 5-benzyl-1,3,4-oxadiazole-2-yl           | 4-Chloro Phenyl          | 180                             | 6.745                   |
| 35                | <i>c</i> -Propyl | 5-benzyl-1,3,4-oxadiazole-2-yl           | 4-Chloro Benzyl          | 11                              | 7.959                   |
| 36                | <i>c</i> -Pentyl | 5-benzyl-1,3,4-oxadiazole-2-yl           | 4-Chloro Benzyl          | 0.24                            | 9.620                   |
| 37                | Methoxy ethyl    | 5-benzyl-1,3,4-oxadiazole-2-yl           | 4-Chloro Benzyl          | 0.94                            | 9.027                   |
| 38 <sup>#</sup>   | Ethoxy methyl    | 5-benzyl-1,3,4-oxadiazole-2-yl           | 4-Chloro Benzyl          | 0.12                            | 9.921                   |
| 39 <sup>*</sup>   | Ethoxy methyl    | 5-benzyl-1,3,4-oxadiazole-2-yl           | 2-Chloro-5-pyridylmethyl | 0.17                            | 9.770                   |
| 40                | Ethoxy methyl    | 5-benzyl-1,3,4-oxadiazole-2-yl           | 3-Chloro-6-pyridylmethyl | 0.023                           | 10.638                  |

\* Marked molecules were considered as the Y-based test set.

# Marked molecules were considered as the k-Medoid-based test set.

**Supplementary Table S2.** Performance summary for the SW-MLR models developed on the two different training and test sets using various correlation cutoff values

| <i>parameters</i>                   | <i>Correlation cutoff</i> |                           |                     |                           |                    |                           |                    |                           |
|-------------------------------------|---------------------------|---------------------------|---------------------|---------------------------|--------------------|---------------------------|--------------------|---------------------------|
|                                     | <i>0.6</i>                |                           | <i>0.7</i>          |                           | <i>0.8</i>         |                           | <i>0.9</i>         |                           |
|                                     | <i>Y-based MLR</i>        | <i>k-Medoid-based MLR</i> | <i>Y-based MLR</i>  | <i>k-Medoid-based MLR</i> | <i>Y-based MLR</i> | <i>k-Medoid-based MLR</i> | <i>Y-based MLR</i> | <i>k-Medoid-based MLR</i> |
| <i>No. Features</i>                 | 4                         | 4                         | 3                   | 4                         | 4                  | 4                         | 4                  | 4                         |
| <i>R<sup>2</sup></i>                | 0.805                     | 0.800                     | 0.777               | 0.815                     | 0.812              | 0.837                     | 0.843              | 0.903                     |
| <i>SEE</i>                          | 0.644                     | 0.645                     | 0.675               | 0.622                     | 0.633              | 0.583                     | 0.579              | 0.451                     |
| <i>R<sup>2</sup><sub>Adj</sub></i>  | 0.776                     | 0.771                     | 0.754               | 0.787                     | 0.784              | 0.813                     | 0.819              | 0.888                     |
| <i>Q<sup>2</sup></i>                | 0.739                     | 0.722                     | 0.687               | 0.735                     | 0.687              | 0.771                     | 0.796              | 0.854                     |
| <i>PRESS</i>                        | 11.209                    | 11.250                    | 12.766              | 10.445                    | 10.817             | 9.165                     | 9.050              | 5.485                     |
| <i>F(4, 27)</i>                     | 27.868                    | 27.083                    | 32.692 <sup>a</sup> | 29.690                    | 29.119             | 34.779                    | 36.122             | 62.636                    |
| <i>R<sup>2</sup><sub>Pred</sub></i> | 0.353                     | 0.650                     | 0.457               | 0.743                     | 0.414              | 0.727                     | 0.679              | 0.834                     |

**Supplementary Table S3.** Feature values and the predicted activity of SW-MLR model (*Equation 1*), MIA-QSAR (*PLS-1*), CoMFA and CoMSIA models for the Y-based training and the test sets

| <i>Cpd No</i> | <i>GATS8v</i> | <i>VE1_Dze</i> | <i>nHBAcc</i> | <i>SHBd</i> | <i>pEC<sub>50</sub></i> | <i>Y<sub>Pred</sub>(Equation 1)</i> | <i>Y<sub>Pred</sub>(PLS 1)</i> | <i>CoMFA</i> | <i>CoMSIA</i> |
|---------------|---------------|----------------|---------------|-------------|-------------------------|-------------------------------------|--------------------------------|--------------|---------------|
| 1             | 1.119196      | 0.29821        | 4             | 0.506276    | 5.301                   | 6.695                               | 5.969                          | 5.825        | 5.983         |
| 2             | 1.127332      | 0.290414       | 4             | 0.485868    | 7.194                   | 6.673                               | 6.952                          | 6.877        | 6.855         |
| 3             | 1.248227      | 0.193783       | 4             | 0.490651    | 6.027                   | 5.545                               | 5.960                          | 5.818        | 6.024         |
| 4             | 1.144883      | 0.093632       | 4             | 0.493931    | 5.167                   | 5.668                               | 5.151                          | 4.988        | 5.022         |
| 5             | 1.067947      | 0.296701       | 4             | 0.478499    | 7                       | 7.057                               | 6.869                          | 6.710        | 6.327         |
| 7             | 1.241512      | 0.173521       | 4             | 0.490651    | 5.585                   | 5.492                               | 5.500                          | 5.587        | 5.759         |
| 8             | 1.178432      | 0.311345       | 4             | 0.477813    | 6.602                   | 6.503                               | 6.563                          | 6.683        | 6.712         |
| 9             | 1.15357       | 0.318411       | 4             | 0.520165    | 6.796                   | 6.552                               | 6.774                          | 6.673        | 6.689         |
| 11            | 1.123266      | 0.241642       | 4             | 0.509111    | 7.046                   | 6.410                               | 7.205                          | 7.068        | 7.159         |
| 12            | 1.082206      | 0.234577       | 4             | 0.458091    | 6.854                   | 6.757                               | 7.223                          | 6.761        | 6.554         |
| 13            | 1.1817        | 0.202989       | 4             | 0.470243    | 7                       | 6.020                               | 7.051                          | 6.976        | 6.984         |
| 14            | 0.923227      | 0.171792       | 4             | 0.481085    | 7.638                   | 7.303                               | 7.309                          | 7.796        | 7.778         |
| 16            | 1.144359      | 0.468239       | 4             | 0.473523    | 6.699                   | 7.411                               | 6.727                          | 6.890        | 6.798         |
| 17            | 1.193742      | 0.283776       | 4             | 0.423368    | 5.854                   | 6.451                               | 6.083                          | 6.114        | 6.228         |
| 19            | 1.249027      | 0.302498       | 4             | 0.335182    | 5.77                    | 6.480                               | 5.535                          | 5.893        | 6.118         |
| 20            | 1.138087      | 0.169759       | 4             | 0.309371    | 6.469                   | 6.583                               | 6.608                          | 6.511        | 6.360         |
| 21            | 1.263577      | 0.254752       | 4             | 0.372535    | 6.244                   | 6.076                               | 5.886                          | 6.205        | 6.248         |
| 22            | 1.285064      | 0.252482       | 4             | 0.343368    | 6.347                   | 6.029                               | 6.030                          | 6.362        | 6.059         |
| 23            | 1.040235      | 0.331288       | 4             | 0.491794    | 7.658                   | 7.329                               | 7.478                          | 7.490        | 7.583         |
| 25            | 0.917617      | 0.363005       | 4             | 0.471386    | 7.959                   | 8.221                               | 7.995                          | 8.075        | 8.056         |
| 26            | 1.005717      | 0.295367       | 4             | 0.284888    | 7.886                   | 7.963                               | 8.182                          | 7.940        | 7.789         |
| 27            | 1.000761      | 0.132099       | 5             | 0.798041    | 6.347                   | 6.733                               | 6.431                          | 6.335        | 6.297         |
| 29            | 0.914906      | 0.322586       | 4             | 0.703349    | 7.367                   | 7.382                               | 8.139                          | 7.316        | 7.243         |
| 31            | 0.884386      | 0.27595        | 5             | 0.687856    | 8.066                   | 8.353                               | 8.258                          | 8.186        | 8.193         |
| 32            | 0.896757      | 0.300227       | 5             | 0.690545    | 8.585                   | 8.385                               | 8.240                          | 8.503        | 8.655         |
| 33            | 0.893769      | 0.326931       | 5             | 0.69259     | 9.398                   | 8.515                               | 9.275                          | 9.360        | 9.383         |
| 34            | 0.914028      | 0.108786       | 5             | 0.703388    | 6.745                   | 7.391                               | 6.630                          | 6.690        | 6.761         |
| 35            | 0.935072      | 0.363737       | 5             | 0.703484    | 7.959                   | 8.417                               | 7.926                          | 7.892        | 7.962         |
| 36            | 0.961103      | 0.378237       | 5             | 0.622668    | 9.62                    | 8.570                               | 9.447                          | 9.640        | 9.689         |
| 37            | 0.865594      | 0.343738       | 6             | 0.752998    | 9.027                   | 9.538                               | 8.943                          | 8.986        | 9.050         |
| 38            | 0.827901      | 0.354349       | 6             | 0.782868    | 9.921                   | 9.711                               | 10.079                         | 9.995        | 9.827         |
| 40            | 0.823258      | 0.329798       | 7             | 0.795213    | 10.638                  | 10.556                              | 10.351                         | 10.623       | 10.625        |
| 6             | 1.125066      | 0.240234       | 4             | 0.485868    | 5.538                   | 6.46071355                          | 5.967                          | 5.905        | 5.963         |
| 10            | 1.182603      | 0.30701        | 4             | 0.477213    | 6.81                    | 6.461812956                         | 6.486                          | 6.827        | 6.511         |
| 15            | 1.230156      | 0.366781       | 4             | 0.470243    | 7.108                   | 6.482750062                         | 7.059                          | 7.386        | 7.485         |
| 18            | 1.245981      | 0.275892       | 4             | 0.383368    | 6.066                   | 6.237937826                         | 6.019                          | 6.312        | 6.273         |
| 24            | 1.02138       | 0.351176       | 4             | 0.464016    | 8.301                   | 7.605326908                         | 7.609                          | 7.523        | 7.599         |
| 28            | 0.931102      | 0.322091       | 6             | 1.203981    | 6.481                   | 7.763908083                         | 8.206                          | 8.384        | 7.255         |

---

|    |          |          |   |          |       |             |       |       |       |
|----|----------|----------|---|----------|-------|-------------|-------|-------|-------|
| 30 | 0.915863 | 0.300965 | 5 | 0.703349 | 7.886 | 8.243353046 | 8.262 | 9.129 | 8.723 |
| 39 | 0.840049 | 0.335257 | 7 | 0.792868 | 9.77  | 10.49251318 | 9.866 | 9.622 | 9.137 |

---

**Supplementary Table S4.** Feature values and the predicted activity of SW-MLR model (*Equation 2*), MIA-QSAR (*PLS-2*), CoMFA and CoMSIA models for the k-medoid-based training and the test sets

| <i>Cpd No</i> | <i>SpMax6_Bhm</i> | <i>GATS8i</i> | <i>VE1_Dze</i> | <i>maxdssC</i> | <i>pEC<sub>50</sub></i> | <i>Y<sub>Pred</sub>(Equation 2)</i> | <i>Y<sub>Pred</sub>(PLS 2)</i> | <i>CoMFA</i> | <i>CoMSIA</i> |
|---------------|-------------------|---------------|----------------|----------------|-------------------------|-------------------------------------|--------------------------------|--------------|---------------|
| 1             | 2.637785          | 0.800901      | 0.29821        | 0.817639       | 5.301                   | 5.476                               | 5.909                          | 5.709        | 5.920         |
| 2             | 2.915377          | 0.859709      | 0.290414       | 0.75588        | 7.194                   | 6.913                               | 6.974                          | 6.893        | 6.835         |
| 4             | 2.822754          | 0.950736      | 0.093632       | 0.784275       | 5.167                   | 4.829                               | 5.132                          | 5.005        | 5.002         |
| 5             | 2.861315          | 0.767374      | 0.296701       | 0.825139       | 7.000                   | 7.038                               | 6.875                          | 6.815        | 6.431         |
| 6             | 2.820824          | 0.877384      | 0.240234       | 0.821713       | 5.538                   | 5.863                               | 5.535                          | 5.544        | 5.830         |
| 7             | 2.761186          | 0.910768      | 0.173521       | 0.820095       | 5.585                   | 4.989                               | 5.460                          | 5.514        | 5.678         |
| 8             | 2.918526          | 0.803597      | 0.311345       | 0.851312       | 6.602                   | 7.185                               | 6.607                          | 6.571        | 6.662         |
| 9             | 2.789834          | 0.829646      | 0.318411       | 0.585139       | 6.796                   | 6.786                               | 6.738                          | 6.647        | 6.708         |
| 10            | 2.92016           | 0.815402      | 0.30701        | 0.862546       | 6.810                   | 7.080                               | 6.575                          | 6.967        | 6.750         |
| 11            | 2.919568          | 0.901344      | 0.241642       | 0.327361       | 7.046                   | 7.302                               | 7.286                          | 7.1          | 7.169         |
| 12            | 2.918285          | 0.840818      | 0.234577       | 0.83588        | 6.854                   | 6.634                               | 7.272                          | 6.798        | 6.522         |
| 14            | 2.907384          | 0.697039      | 0.171792       | 0.735648       | 7.638                   | 7.357                               | 7.369                          | 7.697        | 7.705         |
| 15            | 2.915609          | 0.94879       | 0.366781       | 0.752963       | 7.108                   | 6.724                               | 7.124                          | 7.15         | 7.216         |
| 16            | 2.915734          | 0.956273      | 0.468239       | 0.76662        | 6.699                   | 7.116                               | 6.805                          | 6.85         | 6.737         |
| 17            | 2.916494          | 0.942335      | 0.283776       | 0.76338        | 5.854                   | 6.369                               | 6.082                          | 6.014        | 6.199         |
| 20            | 2.985631          | 0.945215      | 0.169759       | 0.755242       | 6.469                   | 6.272                               | 6.390                          | 6.507        | 6.402         |
| 21            | 2.985603          | 1.039032      | 0.254752       | 0.746909       | 6.244                   | 6.102                               | 5.802                          | 6.199        | 6.244         |
| 22            | 2.956689          | 1.026625      | 0.252482       | 0.771528       | 6.347                   | 5.941                               | 5.841                          | 6.311        | 6.133         |
| 23            | 2.9127            | 0.834827      | 0.331288       | 0.542917       | 7.658                   | 7.654                               | 7.700                          | 7.672        | 7.795         |
| 24            | 2.925733          | 0.814441      | 0.351176       | 0.550417       | 8.301                   | 7.935                               | 8.295                          | 8.203        | 8.326         |
| 26            | 3.079396          | 0.903429      | 0.295367       | 0.463547       | 7.886                   | 8.253                               | 8.206                          | 7.995        | 7.845         |
| 27            | 3.014573          | 0.953564      | 0.132099       | 0.509443       | 6.347                   | 6.709                               | 6.545                          | 6.317        | 6.337         |
| 29            | 3.079396          | 0.971259      | 0.322586       | 0.583263       | 7.367                   | 7.727                               | 8.074                          | 7.357        | 7.259         |
| 30            | 3.079396          | 0.97291       | 0.300965       | 0.583263       | 7.886                   | 7.618                               | 8.180                          | 7.832        | 8.140         |
| 32            | 3.277436          | 0.976858      | 0.300227       | 0.588247       | 8.585                   | 8.802                               | 8.224                          | 8.543        | 8.555         |
| 33            | 3.282642          | 0.979863      | 0.326931       | 0.587477       | 9.398                   | 8.939                               | 9.179                          | 9.389        | 9.434         |
| 34            | 3.188512          | 0.960653      | 0.108786       | 0.582482       | 6.745                   | 7.488                               | 6.630                          | 6.739        | 6.678         |
| 35            | 3.295235          | 1.018535      | 0.363737       | 0.650579       | 7.959                   | 8.824                               | 8.092                          | 7.978        | 7.965         |
| 36            | 3.302244          | 1.040539      | 0.378237       | 0.671413       | 9.620                   | 8.758                               | 9.489                          | 9.687        | 9.711         |
| 37            | 3.250415          | 0.962315      | 0.343738       | 0.462477       | 9.027                   | 9.170                               | 8.902                          | 9.044        | 8.877         |
| 39            | 3.250694          | 0.91831       | 0.335257       | 0.356991       | 9.770                   | 9.609                               | 9.935                          | 9.787        | 9.920         |
| 40            | 3.24619           | 0.849971      | 0.329798       | 0.355255       | 10.638                  | 9.979                               | 10.213                         | 10.606       | 10.454        |
| 3             | 2.87482           | 0.917422      | 0.193783       | 0.773244       | 6.027                   | 5.833                               | 5.793                          | 5.559        | 6.096         |
| 13            | 2.920457          | 0.910434      | 0.202989       | 0.762966       | 7.000                   | 6.220                               | 7.042                          | 6.876        | 6.979         |
| 18            | 2.920877          | 0.988892      | 0.275892       | 0.77412        | 6.066                   | 6.053                               | 5.984                          | 6.329        | 6.251         |
| 19            | 2.985625          | 1.059052      | 0.302498       | 0.786202       | 5.770                   | 6.121                               | 5.770                          | 6.175        | 6.504         |
| 25            | 2.933138          | 0.764988      | 0.363005       | 0.481157       | 7.959                   | 8.474                               | 8.048                          | 8.838        | 8.580         |
| 28            | 3.079396          | 1.004629      | 0.322091       | 0.607356       | 6.481                   | 7.473                               | 8.121                          | 8.753        | 7.118         |
| 31            | 3.261997          | 0.971999      | 0.27595        | 0.589249       | 8.066                   | 8.623                               | 8.378                          | 8.709        | 7.768         |

---

|    |          |          |          |          |       |       |       |       |        |
|----|----------|----------|----------|----------|-------|-------|-------|-------|--------|
| 38 | 3.251207 | 0.902659 | 0.354349 | 0.365255 | 9.921 | 9.780 | 9.933 | 9.547 | 10.663 |
|----|----------|----------|----------|----------|-------|-------|-------|-------|--------|

---

**Supplementary Table S5.** Detailed summary of SW-MLR model (*Equation 1*) for the Y-based dataset division method.

| Regression Summary for Dependent Variable: $pEC_{50}$ (Y-based SW-MLR Equation 1)                   |             |                 |          |                 |              |                |
|-----------------------------------------------------------------------------------------------------|-------------|-----------------|----------|-----------------|--------------|----------------|
| R= .91790830 R <sup>2</sup> = .84255564 Adjusted R <sup>2</sup> = .81923055 F(4,27)=36.122 p<.00000 |             |                 |          |                 |              |                |
| Std.Error of estimate: .57895                                                                       |             |                 |          |                 |              |                |
|                                                                                                     | <b>Beta</b> | <b>Std.Err.</b> | <b>B</b> | <b>Std.Err.</b> | <b>t(27)</b> | <b>p-level</b> |
| <b>Intercept</b>                                                                                    |             |                 | 9.26493  | 2.061315        | 4.49467      | 0.000118       |
| <b>GATS8v</b>                                                                                       | -0.589053   | 0.126204        | -5.62583 | 1.205333        | -4.66745     | 0.000074       |
| <b>VE1_Dze</b>                                                                                      | 0.277965    | 0.080212        | 4.48776  | 1.295027        | 3.46538      | 0.001785       |
| <b>nHBacc</b>                                                                                       | 0.537723    | 0.133909        | 0.96426  | 0.240129        | 4.01559      | 0.000425       |
| <b>SHBd</b>                                                                                         | -0.315141   | 0.144253        | -2.90190 | 1.328320        | -2.18464     | 0.037772       |



**Supplementary Table S6.** Detailed summary of SW-MLR model (*Equation 2*) for the k-medoid-based -based dataset division method.

| Regression Summary for Dependent Variable: $pEC_{50}$ (004_k-Medoid-based SW-MLR Equation 2)        |             |                 |          |                 |              |                |
|-----------------------------------------------------------------------------------------------------|-------------|-----------------|----------|-----------------|--------------|----------------|
| R= .95011445 R <sup>2</sup> = .90271746 Adjusted R <sup>2</sup> = .88830523 F(4,27)=62.636 p<.00000 |             |                 |          |                 |              |                |
| Std.Error of estimate: .45074                                                                       |             |                 |          |                 |              |                |
|                                                                                                     | <b>Beta</b> | <b>Std.Err.</b> | <b>B</b> | <b>Std.Err.</b> | <b>t(27)</b> | <b>p-level</b> |
| <b>Intercept</b>                                                                                    |             |                 | -5.64028 | 1.942545        | -2.90355     | 0.007268       |
| <b>SpMax6_Bhm</b>                                                                                   | 0.808594    | 0.089087        | 6.16569  | 0.679307        | 9.07644      | 0.000000       |
| <b>GATS8i</b>                                                                                       | -0.384499   | 0.072647        | -6.12614 | 1.157468        | -5.29271     | 0.000014       |
| <b>VE1_Dze</b>                                                                                      | 0.281433    | 0.062384        | 4.57326  | 1.013726        | 4.51133      | 0.000113       |
| <b>maxdssC</b>                                                                                      | -0.227529   | 0.074401        | -1.96263 | 0.641767        | -3.05817     | 0.004980       |

**Supplementary Table S7.** Detailed summary of SW-MLR model (*Equation 1*) for the k-medoid-based-based dataset division method.

| <i>Equation 1</i> |          |                       |                                      | <i>Equation 2</i> |          |                       |                                      |
|-------------------|----------|-----------------------|--------------------------------------|-------------------|----------|-----------------------|--------------------------------------|
| <i>Model Type</i> | <i>R</i> | <i>R</i> <sup>2</sup> | <i>Q</i> <sup>2</sup> ( <i>LOO</i> ) | <i>Model Type</i> | <i>R</i> | <i>R</i> <sup>2</sup> | <i>Q</i> <sup>2</sup> ( <i>LOO</i> ) |
| Original          | 0.917908 | 0.842556              | 0.796337                             | Original          | 0.950114 | 0.902717              | 0.854371                             |
| Random 1          | 0.376041 | 0.141407              | -0.17356                             | Random 1          | 0.360832 | 0.1302                | -0.21735                             |
| Random 2          | 0.397835 | 0.158273              | -0.15633                             | Random 2          | 0.438829 | 0.19257               | -0.14956                             |
| Random 3          | 0.445661 | 0.198614              | -0.28324                             | Random 3          | 0.409615 | 0.167784              | -0.16015                             |
| Random 4          | 0.356204 | 0.126881              | -0.24145                             | Random 4          | 0.46516  | 0.216373              | -0.10002                             |
| Random 5          | 0.36812  | 0.135512              | -0.24435                             | Random 5          | 0.382932 | 0.146637              | -0.18408                             |
| Random 6          | 0.141327 | 0.019973              | -0.32574                             | Random 6          | 0.17255  | 0.029773              | -0.55269                             |
| Random 7          | 0.370879 | 0.137551              | -0.34505                             | Random 7          | 0.377326 | 0.142375              | -0.27264                             |
| Random 8          | 0.28186  | 0.079445              | -0.28115                             | Random 8          | 0.172029 | 0.029594              | -0.44062                             |
| Random 9          | 0.139305 | 0.019406              | -0.37919                             | Random 9          | 0.371957 | 0.138352              | -0.32177                             |
| Random 10         | 0.342797 | 0.11751               | -0.32936                             | Random 10         | 0.241188 | 0.058172              | -0.27312                             |
| Random 11         | 0.385715 | 0.148776              | -0.2483                              | Random 11         | 0.265274 | 0.070371              | -0.2466                              |
| Random 12         | 0.362452 | 0.131371              | -0.30337                             | Random 12         | 0.424699 | 0.180369              | -0.16888                             |
| Random 13         | 0.23074  | 0.053241              | -0.21509                             | Random 13         | 0.344625 | 0.118767              | -0.30115                             |
| Random 14         | 0.634012 | 0.401971              | 0.108131                             | Random 14         | 0.549483 | 0.301932              | 0.035059                             |
| Random 15         | 0.359919 | 0.129542              | -0.26069                             | Random 15         | 0.413452 | 0.170942              | -0.13475                             |
| Random 16         | 0.236816 | 0.056082              | -0.34069                             | Random 16         | 0.259479 | 0.067329              | -0.34643                             |
| Random 17         | 0.351411 | 0.123489              | -0.21933                             | Random 17         | 0.140377 | 0.019706              | -0.40212                             |
| Random 18         | 0.311395 | 0.096967              | -0.18014                             | Random 18         | 0.452136 | 0.204427              | -0.17723                             |
| Random 19         | 0.330382 | 0.109152              | -0.18735                             | Random 19         | 0.368105 | 0.135502              | -0.20943                             |
| Random 20         | 0.383558 | 0.147117              | -0.19294                             | Random 20         | 0.459212 | 0.210876              | -0.14046                             |
| Random 21         | 0.274253 | 0.075215              | -0.21276                             | Random 21         | 0.266633 | 0.071093              | -0.30134                             |
| Random 22         | 0.367058 | 0.134732              | -0.22867                             | Random 22         | 0.365204 | 0.133374              | -0.15912                             |
| Random 23         | 0.436234 | 0.1903                | -0.08498                             | Random 23         | 0.339342 | 0.115153              | -0.27219                             |
| Random 24         | 0.364171 | 0.132621              | -0.28761                             | Random 24         | 0.318595 | 0.101503              | -0.25046                             |
| Random 25         | 0.317792 | 0.100992              | -0.20634                             | Random 25         | 0.125693 | 0.015799              | -0.48744                             |
| Random 26         | 0.455467 | 0.20745               | -0.05875                             | Random 26         | 0.382545 | 0.146341              | -0.21154                             |
| Random 27         | 0.606437 | 0.367766              | 0.083009                             | Random 27         | 0.276622 | 0.07652               | -0.31583                             |
| Random 28         | 0.214059 | 0.045821              | -0.62875                             | Random 28         | 0.371149 | 0.137751              | -0.13164                             |
| Random 29         | 0.398996 | 0.159198              | -0.14556                             | Random 29         | 0.241972 | 0.058551              | -0.26436                             |
| Random 30         | 0.230546 | 0.053151              | -0.25307                             | Random 30         | 0.376017 | 0.141389              | -0.21743                             |
| Random 31         | 0.252456 | 0.063734              | -0.25196                             | Random 31         | 0.127127 | 0.016161              | -0.3897                              |
| Random 32         | 0.237798 | 0.056548              | -0.26808                             | Random 32         | 0.453498 | 0.20566               | -0.13012                             |
| Random 33         | 0.537429 | 0.28883               | -0.16068                             | Random 33         | 0.490119 | 0.240217              | -0.09953                             |
| Random 34         | 0.399712 | 0.159769              | -0.26869                             | Random 34         | 0.097789 | 0.009563              | -0.43003                             |
| Random 35         | 0.315261 | 0.09939               | -0.22974                             | Random 35         | 0.164736 | 0.027138              | -0.35385                             |
| Random 36         | 0.249517 | 0.062259              | -0.32364                             | Random 36         | 0.203548 | 0.041432              | -0.43699                             |
| Random 37         | 0.30203  | 0.091222              | -0.28416                             | Random 37         | 0.413726 | 0.171169              | -0.14606                             |

|                                        |          |          |          |                                        |          |          |          |
|----------------------------------------|----------|----------|----------|----------------------------------------|----------|----------|----------|
| Random 38                              | 0.24414  | 0.059605 | -0.2153  | Random 38                              | 0.423607 | 0.179443 | -0.15927 |
| Random 39                              | 0.719334 | 0.517441 | 0.365838 | Random 39                              | 0.460145 | 0.211734 | -0.14512 |
| Random 40                              | 0.271324 | 0.073617 | -0.20078 | Random 40                              | 0.32791  | 0.107525 | -0.33514 |
| Random 41                              | 0.285283 | 0.081387 | -0.47815 | Random 41                              | 0.393034 | 0.154476 | -0.1302  |
| Random 42                              | 0.333272 | 0.111107 | -0.3855  | Random 42                              | 0.278144 | 0.077364 | -0.36992 |
| Random 43                              | 0.190123 | 0.036147 | -0.40415 | Random 43                              | 0.372053 | 0.138423 | -0.18563 |
| Random 44                              | 0.399579 | 0.159664 | -0.1929  | Random 44                              | 0.286692 | 0.082192 | -0.33758 |
| Random 45                              | 0.202534 | 0.04102  | -0.43864 | Random 45                              | 0.262917 | 0.069125 | -0.36092 |
| Random 46                              | 0.174132 | 0.030322 | -0.31375 | Random 46                              | 0.29606  | 0.087652 | -0.28867 |
| Random 47                              | 0.311221 | 0.096858 | -0.31967 | Random 47                              | 0.120313 | 0.014475 | -0.35229 |
| Random 48                              | 0.350317 | 0.122722 | -0.25747 | Random 48                              | 0.281385 | 0.079178 | -0.29157 |
| Random 49                              | 0.219899 | 0.048355 | -0.32574 | Random 49                              | 0.242419 | 0.058767 | -0.34537 |
| Random 50                              | 0.264212 | 0.069808 | -0.51079 | Random 50                              | 0.302617 | 0.091577 | -0.35148 |
| <b><i>Random Models Parameters</i></b> |          |          |          | <b><i>Random Models Parameters</i></b> |          |          |          |
| <i>Average R</i>                       | 0.346057 |          |          | <i>Average R</i>                       | 0.334921 |          |          |
| <i>Average R<sup>2</sup></i>           | 0.139448 |          |          | <i>Average R<sup>2</sup></i>           | 0.131285 |          |          |
| <i>Average Q<sup>2</sup>(LOO)</i>      | -0.2253  |          |          | <i>Average Q<sup>2</sup>(LOO)</i>      | -0.23844 |          |          |
| <i>cRp<sup>2</sup></i>                 | 0.784575 |          |          | <i>cRp<sup>2</sup></i>                 | 0.849083 |          |          |
